# Supplementary figures and images for: Low-intensity low-frequency ultrasound enhances the chemosensitivity of gemcitabine-resistant ASPC-1 cells via PI3K/AKT/NF-κB pathway-mediated ABC transporters
Source: PubMed Central journal article supplement — Oncol Rep. 2020 Jul 7;44(3):1158–68. doi: 10.3892/or.2020.7671 (PMC7388575; doi:10.3892/or.2020.7671), 2020-07-07

Figure S1. Mice were treated with LILFU. LILFU, low-intensity low-frequency ultrasound.

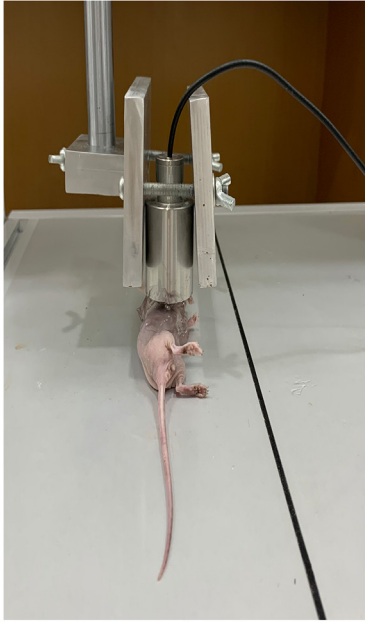

Supplement: Supplementary_Data.pdf [file Supplementary_Data.pdf]
